# Supplementary material
Source: PubMed Central journal article supplement (PMC3189405)
Supplement: NIHMS321858-supplement-1_si_001.pdf [file NIHMS321858-supplement-1_si_001.pdf]

**Supporting Information**  
**for**  
**Molecular Dynamics Simulation Studies of**  
**Caffeine Aggregation in Aqueous Solution**

Letizia Tavagnacco<sup>§</sup>, Udo Schnupf<sup>†</sup>, Philip E. Mason<sup>†</sup>,  
Marie-Louise Saboungi<sup>‡</sup>, Attilio Cesàro<sup>\*,§</sup>, and John W. Brady<sup>\*,†</sup>

<sup>†</sup>Department of Food Science  
Cornell University  
Ithaca, NY 14853

<sup>§</sup> Department of Life Sciences  
University of Trieste  
Trieste, Italy

<sup>‡</sup> Centre de Recherche sur la Matière Divisée  
1 bis rue de la Férellerie  
45071 Orléans, FRANCE

\* Authors to whom correspondence should be addressed; +1 (607) 255-2897; jwb7@cornell.edu

## Supplementary Material

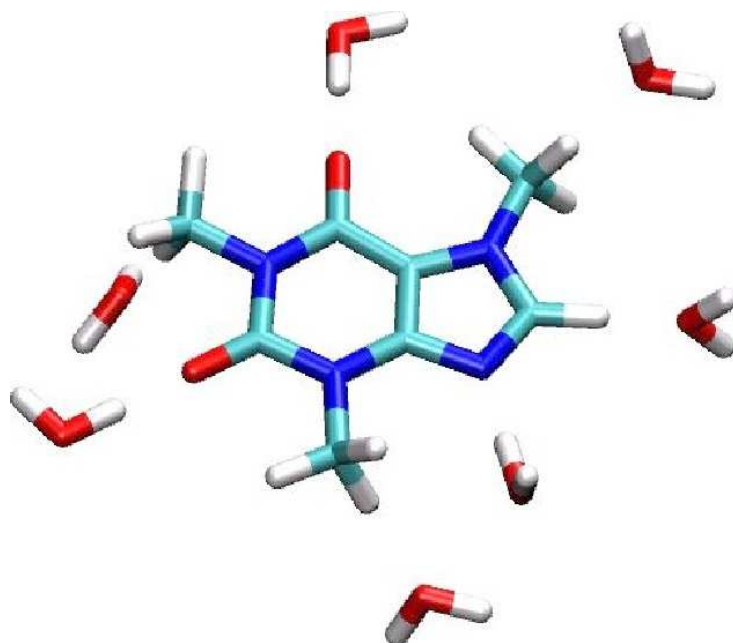

**Figure S1.** The positions for water molecules used in the charge optimization.

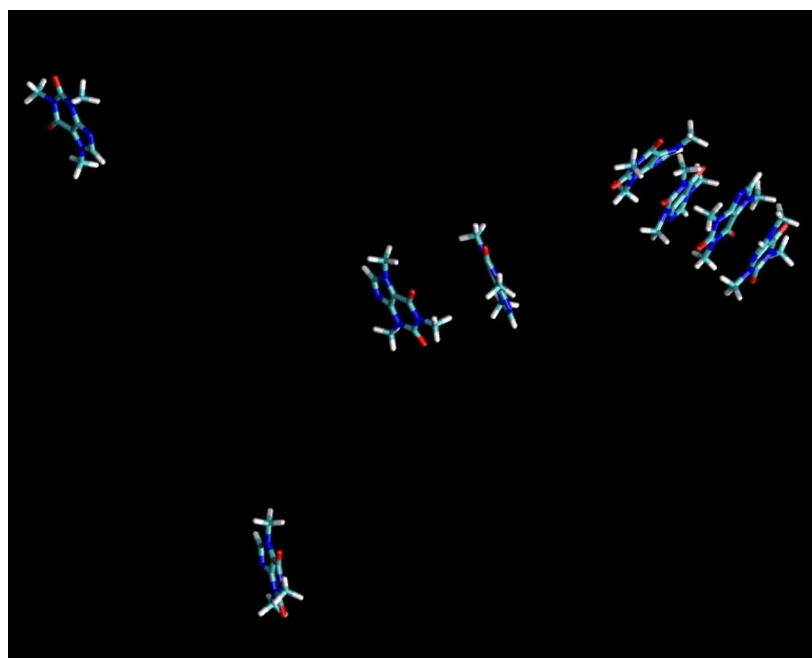

**Figure S2.** A representative snapshot from the simulation showing monomers and clusters of two different sizes.
